# Supplementary material for: Undocumented translocations spawn taxonomic inflation in Sri Lankan fire rasboras (Actinopterygii, Cyprinidae)
Source: PeerJ. 2018 Dec 20;6:e6084. doi: 10.7717/peerj.6084 (PMC6304270; doi:10.7717/peerj.6084)
Supplement: File S1 — Raw data of Rasboroides used in the morphological analyses along with sampling localities and voucher numbers. [file peerj-06-6084-s001.xlsx]

## Sheet: Sheet1
Code	Species	Specimen NO	Ex	Location	River basin	Sex	SL	TL	PDL	PoDL	PAL	PPL	CPL	CPD	BD	DFH	DFBL	AFH	AFBL	PFH	PeFH	LUCFL	LLCFL	HL	HD	SNL	ED	IOW	INW	LL	PORED LL	LL TO D	LL TO P	LL TO A	TT	CIRCUMPED	PRE DORSAL	PRE PELVIC	DF	AF	VF	PF	CF
1	pallidus	DZ3972	A	Lewwanduwa	Bentara	male	32.5	44.9	18.1	18.4	21.5	16.3	7.5	4.8	14.4	12.3	4.4	10.8	5.9	8.9	8.7	11.6	13	9	7.8	2.8	3.5	3.2	2.4	24	4	4	3	3	8	10	12	15	iii.7.5	iii.6.5	i.7	i.11	9+8
1	pallidus	DZ3972	B	Lewwanduwa	Bentara	male	31	42.4	17.2	16.5	20.1	15.1	7.1	4.3	13.2	11.7	4.2	10.6	5.5	8.2	7.8	11.1	12.7	8.6	7	2	3.1	3.2	1.8	25	3	4.5	3.5	3	8.5	10	13	14	iii.7.5	iii.6.5	i.7	i.10	9+8
2	pallidus	DZ3972	C	Lewwanduwa	Bentara	female	24.3		12.7	12.6	14.8	11.3	5.6	3	7.8	8.5	2.7	6.6	3.2	5.9	5.9			6.3	5.4	1.5	2.6	2.1	1.3	25	4	3.5	4	3	7.5	8	10	15
2	pallidus	DZ3972	D	Lewwanduwa	Bentara	female	24.4		12.9	13.1	15.4	11.7	5.4	2.7	7.9	8.1	2.7	7	3.4	5.8	5.6			6.2	5.1	1.3	2.6	2.1	1.1	26	4	3.5	4	3.5	8	8	11	15
2	pallidus	DZ3972	E	Lewwanduwa	Bentara	female	26.6		14.3	14	16.2	12.3	6	3.1	8.9	8.5	2.8	7.3	4.2	6.3	6			7.2	5.6	1.7	3.1	2.1	1.3	25	5	3.5	3.5	3	7.5	10	12	16
2	pallidus	DZ3973	A	Kaludola, Pitigala	Bentara	female	29.4		16	15.1	18.8	14.3	6.6	3.5	9.7	8.9	3.5	7.8	4.5	6.2	6.3			7.6	6.5	2.5	3.1	3	1.6	25	4	3.5	3.5	3	7.5	8	11	12	iii.7.5	iii.6.5	i.7	i.11	9+8
1	pallidus	DZ3973	B	Kaludola, Pitigala	Bentara	male	27.4		15	14.9	17	13	6.3	3.6	9.6	8.8	3.7	7.7	4.5	7.4	7.7			7.2	5.8	2	2.9	2.6	1.5	26	3	4	3.5	3.5	8.5	8	12	14	iii.7.5	iii.6.5	i.7	i.11	9+8
1	pallidus	DZ3973	C	Kaludola, Pitigala	Bentara	male	27.6		14.7	15.1	17.3	13.1	5.9	3.6	9.5	10	3.6	8	4.5	7.1	7.5			7.2	6.1	1.8	3.2	2.6	1.7
1	pallidus	DZ3973	D	Kaludola, Pitigala	Bentara	male	25.8		14.1	13.4	16.4	11.9	5.6	3.4	9.2	8.5	3.1	8.1	4.2	6.4	7.3			7	5.9	1.7	2.7	2.6	1.4
1	pallidus	DZ3973	E	Kaludola, Pitigala	Bentara	male	26.1		14.5	14.1	16.8	12.7	5.6	3.4	9.5	9.7	3.7	8.4	4.1	6.7	7.2			7.1	5.5	1.7	3	2.8	1.5
1	pallidus	DZ3973	F	Kaludola, Pitigala	Bentara	male	25.1		13.8	13.3	15.9	12.1	5.4	3.4	9.4	9.1	3.2	7.9	3.8	6.5	7.1			7	5.8	1.7	2.9	2.5	1.5
2	pallidus	DZ3973	G	Kaludola, Pitigala	Bentara	female	22.8		12.3	12.3	14.6	10.9	5	3	7.4	7.4	3	5.2	3.8	5.3	5.2			6.3	4.7	1.4	2.6	2.2	1.4
1	pallidus	DZ3973	H	Kaludola, Pitigala	Bentara	male	22.9		12.1	11.7	14.4	11.1	5	2.7	7.7	8.3	3.2	6.8	3.4	5.2	5.6			6.3	4.7	1.3	2.8	2.4	1.3
1	pallidus	DZ3904	A	Ma dola	Gin	male	25.4	34.5	13.6	14.4	16.3	12.2	6.3	3.4	8.7	9.3	3.4	7.7	3.7	6.3	7.1	10.4	11.1	6.9	5.9	2.1	2.7	2.4	1.5	30	6	4	3.5	3.5	8.5	10	12	19	iii.7.5	iii.6.5	i.7	i.11	9+8
1	pallidus	DZ3904	B	Ma dola	Gin	male	24.9		13.7	14	14.7	11.9	6.3	3.3	8.3	8.2	3.5	7.4	4.1	6.1	7.1	10.2	11.1	7	5.4	1.9	2.8	2.4	1.6	28	5	4	3.5	3.5	8.5	10	12	15	iii.7.5	iii.6.5	i.7	i.10	9+8
2	pallidus	DZ3904	C	Ma dola	Gin	female	26.2		14	13.6	16.2	12.2	6.1	3.4	8.3	8.7	3.7	6.6	3.6	5.7	6.1	10.3	9	6.8	5.5	1.8	2.8	2.6	1.3	29	4	4	3.5	3.5	8.5	10	11	17	iii.7.5	iii.6.5	i.7	i.10	9+8
2	pallidus	DZ3904	D	Ma dola	Gin	female	23.4		13.4	12.4	15.1	11.7	5.1	3.2	7.8	8	3.1	6.3	3.8	5	5.9	10	10	6.5	5.5	1.6	2.5	2.3	1.5	28	5	3.5	3.5	3.5	8	10	13	18	iii.7.5	iii.6.5	i.7	i.10	9+8
2	pallidus	DZ3904	E	Ma dola	Gin	female	22.2		12.9	11.9	14.8	11.1	5.1	3.1	7.7	6.7	3	6.1	3.6	5.1	5.6	9.4	9.3	6	5.2	1.6	2.5	2.2	1.3
1	pallidus	DZ3904	F	Ma dola	Gin	male	22.6		12.5	12.1	14	10.8	5.6	3	7.7	8.3	2.7	6.7	3.3	5.6	6			5.5	4.9	1.6	2.3	2.2	1.3
1	pallidus	DZ3904	G	Ma dola	Gin	male	22.2		11.7	11.2	13	10	5.2	2.8	7.3	8.2	3	6.8	3.7	5.1	5.4			5.5	4.7	1.7	2.4	2.1	1.2
3	rohani	DZ3971	A	Suriyakanda	Walawe	male	33.6	45	18.2	18.4	20.9	15.8	7.8	4.4	13.3	13.9	4.7	13.7	5.7	10.6	9.8			9.3	7.5	2	3.5	3.3	2.1	27	3	3.5	3..5	3.5	8	8	12	15	iii.7.5	iii.6.5	i.7	i.10	9+8
3	rohani	DZ3971	B	Suriyakanda	Walawe	male	31.9		16.5	17.6	19.7	15	7.7	4.2	11.7	11.9	4.5	10	5.6	8.1	9.3			8.6	7.1	2.1	3.3	2.9	1.9	26	2	4.5	3.5	3.5	9	8	12	15	iii.7.5	iii.6.5	i.7	i.11	9+8
3	rohani	DZ3971	C	Suriyakanda	Walawe	male	32.2		16.9	17	20.3	15.1	7.3	4	12	11.5	4.5	11.1	5.7	9.2	9.8			9.2	7.3	2.2	3.6	3.2	1.8	28	2	3.5	3.5	3.5	8	8			iii.7.5	iii.6.5	i.7	i.10	9+8
3	rohani	DZ3971	D	Suriyakanda	Walawe	male	30.8		16.5	16.1	18.6	14.7	7.6	4	11.8	12	3.9	11.9	5	9.1	8.8			8.4	7	1.9	3.1	3	1.7
4	rohani	DZ3971	E	Suriyakanda	Walawe	female	28.9		15.2	15.6	18.1	13.7	6.8	3.4	10.1	9.7	3.7	9.1	4.5	6.7	7.2			7.9	6.2	2.3	3.1	2.6	1.8
3	rohani	DZ3971	F	Suriyakanda	Walawe	male	30.5		16.1	16.4	18.6	14	7.8	3.9	12	10.9	3.5	9.3	5.4	8.2	9			8.2	6.9	2	3.1	2.9	1.6
3	rohani	DZ3971	G	Suriyakanda	Walawe	male	30.3		15.4	16.8	18.3	14.1	8	4	11.4	11.2	4.1	10.6	5.1	7.7	8.3			7.9	6.3	2	2.9	2.9	1.8
4	rohani	DZ3971	H	Suriyakanda	Walawe	female	28.8		15.2	15.2	17.8	13.7	7	3.8	10.2	9.3	3.4	8.3	4.7	7.3	7.1			7.9	6.4	2	3	2.9	1.8
3	rohani	DZ3971	I	Suriyakanda	Walawe	male	28.8		15.8	16.1	18.5	15	8	4	11.6	10.5	4.3	9.3	5.3	7.7	7.4			8.2	6.8	2	3	2.7	1.6
3	rohani	DZ3971	J	Suriyakanda	Walawe	male	25.6		13.9	13.4	16.2	12.3	5.4	3	8.8	9.6	3.7	7.5	4.1	6	6.3			6.3	5	1.4	2.8	2.2	1.1
3	rohani	DZ3971	K	Suriyakanda	Walawe	male	25.8		13.4	13.5	15.3	11.7	5.8	3.4	8.2	8.1	3.1	6.3	4.4	5.5	6.1			6.7	5.1	1.6	2.6	2.3	1.4
3	rohani	DZ3971	L	Suriyakanda	Walawe	male	25.9		13.6	13.8	15.9	11.8	6	3.2	9.2	8.4	3.1	6.6	3.6	6	6.3			6.8	5.6	1.7	2.7	2.4	1.5
5	vaterifloris	DZ3768	A	Gilimale	Kalu	male	24.2	32.7	13	12.9	15.1	11.2	5.7	3	7.5	8	3	6.8	3.8	6.6	6			6.3	4.6	1.6	2.7	2.3	1.4	27	3	4	3.5	3.5	8.5	10	13	17	iii.7.5	iii.6.5	i.7	i.11	9+8
6	vaterifloris	DZ3768	B	Gilimale	Kalu	female	25.4		13.2	12.9	15	11.6	6	2.8	6.9	8.1	2.8	7	3.4	5.7	5.6			6.6	4.7	1.3	2.8	2.3	1.4	27	3	4	3.5	3.5	8.5	10	12	16	iii.7.5	iii.6.5	i.7	i.11
6	vaterifloris	DZ3768	C	Gilimale	Kalu	female	24		12.8	12.5	14.9	11.2	5.7	3.1	7.5	7.6	3.1	6.2	3.8	5.5	5.4			6.6	4.5	1.4	2.7	2.4	1.3	27	2	4	3.5	3.5	8.5	10	12	16	iii.7.5	iii.6.5	i.7	i.12	9+8
6	vaterifloris	DZ3768	D	Gilimale	Kalu	female	24.4		12.4	12.2	14.7	10.9	5.8	3.2	7.2	7.7	2.9	6.1	3.3	5.3	5.5			6.7	4.8	1.4	2.9	2.4	1.4	26	2	4.5	3.5	3	8.5	10	12	15	iii.7.5	iii.6.5	i.7	i.11	9+8
5	vaterifloris	DZ3768	E	Gilimale	Kalu	male	21.2		11	11	12.8	9.7	5.4	2.7	6.4	7.8	2.9	6	3.2	5.1	4.9			6.1	4.1	1.1	2.8	2.1	1.2	30	3	4	3.5	3.5	8.5	10			iii.7.5	iii.6.5	i.7	i.11	9+8
6	vaterifloris	DZ3768	F	Gilimale	Kalu	female	23.9		12.4	12.1	15	10.8	5.9	2.7	6.9	7.9	2.9	6.4	3.6	5.5	5.4			6.7	4.8	1.3	2.8	2.3	1.4
5	vaterifloris	DZ3768	G	Gilimale	Kalu	male	21.4		11.2	11.3	13.1	10.1	5.2	2.6	6.2	7.7	3.1	6.1	3.2	5	5.1			5.6	4	1.1	2.4	1.8	1.1
6	vaterifloris	DZ3768	H	Gilimale	Kalu	female	22		11.4	11.4	13.9	10.1	5.1	2.8	6.6	6.8	2.8	5.7	3.3	4.9	4.7			6	4.6	1.4	2.5	2.1	1.1
6	vaterifloris	DZ3768	I	Gilimale	Kalu	female	21.6		11.1	11	12.6	9.9	5.2	2.7	6.3	6.8	2.4	5.2	3.1	4.6	4.5			5.9	4.2	1.2	2.3	1.9	1
7	nigromarginatus	DZ3970	A	Athwelthota	Kalu	male	28.9	38	15.6	15.4	17.8	13.3	6.8	3.5	9.5	9.8	3.6	9	4.4	6.8	7.1			7.4	6.1	1.8	2.9	2.8	1.8	26	3	4	3.5	3.5	8.5	10	15	17	iii.7.5	iii.6.5	i.7	i.11	9+8
7	nigromarginatus	DZ3970	B	Athwelthota	Kalu	male	27		14.4	14.1	16.4	12.2	6.7	3.2	8.5	9.9	3.4	8.6	4.3	6.9	6.3			6.8	5.4	1.5	2.9	2.5	1.3	28	5	4	4	3.5	8.5	10	15	17	iii.7.5	iii.6.5	i.7	i.10	9+8
7	nigromarginatus	DZ3970	C	Athwelthota	Kalu	male	24.9		13.2	13.3	14.6	11	6.2	2.9	8.5	8.1	3.2	7.1	4	5.7	5.6			6.3	5.2	1.8	2.8	2.5	1.3	29	3	4	3.5	3.5	8.5	10	12	15	iii.7.5	iii.6.5	i.7	i.11	9+8
8	nigromarginatus	DZ3970	D	Athwelthota	Kalu	female	25.8		13.8	12.9	16	11.9	6.5	3.1	7.7	7.5	3.4	7	3.9	5.6	5.8			7	5.2	1.4	2.8	2.2	1.4		4
8	nigromarginatus	DZ3970	E	Athwelthota	Kalu	female	26.1		13.6	13.6	16.2	12	6	3.2	8.3	7.7	3.5	6.1	3.5	5.2	5.3			7	5.2	1.5	3	2.6	1.4		4
8	nigromarginatus	DZ3970	F	Athwelthota	Kalu	female	25.5		12.8	13.2	16.6	11.9	6.2	2.8	7.6	8	3.4	5.2	3.7	5.3	5.3			6.8	4.9	1.6	2.8	2.3	1.3
7	nigromarginatus	DZ3970	G	Athwelthota	Kalu	male	24.7		13	13.3	15	11.5	5.9	3.2	8	8.1	2.9	7.5	4.1	6.1	6			7	4.9	1.5	2.8	2.5	1.4
8	nigromarginatus	DZ3970	H	Athwelthota	Kalu	female	23.3		12.1	12	14.1	10.5	5.2	2.9	7.4	6.8	2.7	5.8	3.4	5.3	4.8			6	4.5	1.3	2.3	2.2	1.2
8	nigromarginatus	DZ3970	I	Athwelthota	Kalu	female	21.7		11.3	11.3	12.9	9.8	5.8	2.7	5.9	6.6	2.8	5.2	3	5	4.3			5.5	4.3	1.2	2.3	1.8	1.2
